# Supplementary material for: Luminescence properties of Mn4+with high2Eglevel energy in the polyfluoride Na3Li3Sc2F12
Source: Royal Society of Chemistry journal article supplement (doi:10.1039/d0dt02389b), 2020-01-01
Supplement: d0dt02389b1.pdf [file d0dt02389b1.pdf]

***Electronic Supplementary Information (ESI)***

**Luminescent properties of Mn<sup>4+</sup> with the high <sup>2</sup>E<sub>g</sub> level energy in  
polyfluoride Na<sub>3</sub>Li<sub>3</sub>Sc<sub>2</sub>F<sub>12</sub>**

Hong Li, Yan Liu, Shu Tang, Lijun Luo\*, Qiang Zhou, Zhengliang Wang\*

Key Laboratory of Green-Chemistry Materials in University of Yunnan Province,  
National and Local Joint Engineering Research Center for Green Preparation  
Technology of Biobased Materials, School of Chemistry & Environment, Yunnan  
Minzu University, Kunming, 650500, P. R. China

**Email:** wangzhengliang@foxmail.com (Zhengliang Wang);

10501931@qq.com (Lijun Luo)

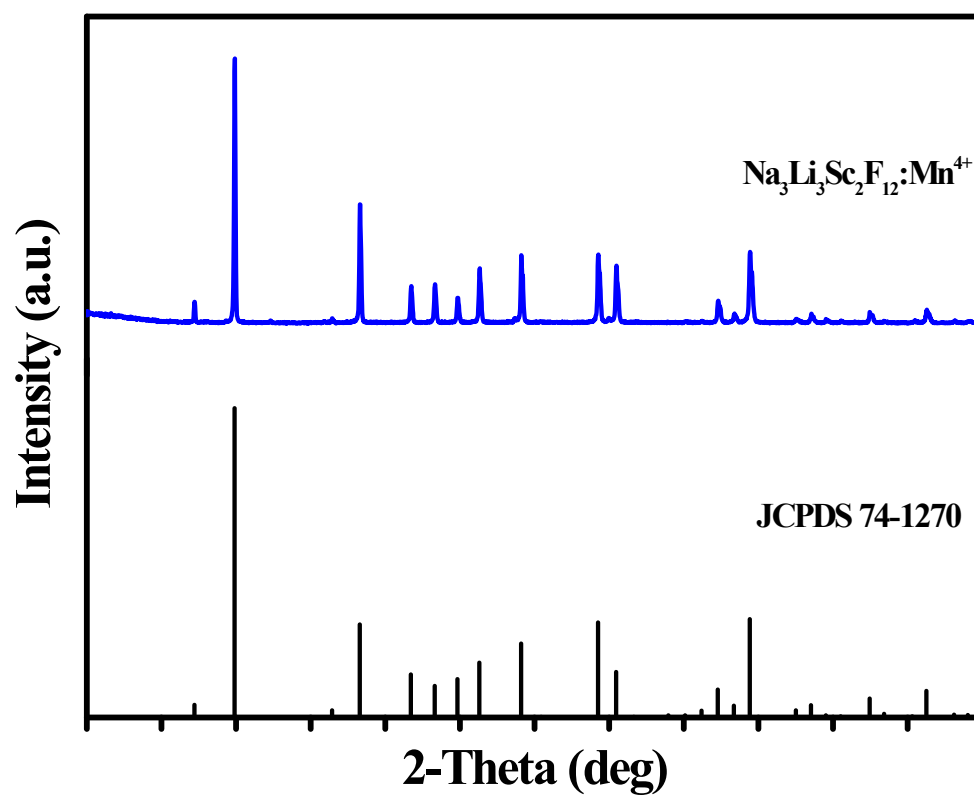

Fig. S1 XRD pattern of  $\text{Na}_3\text{Li}_3\text{Sc}_2\text{F}_{12}:\text{Mn}^{4+}$

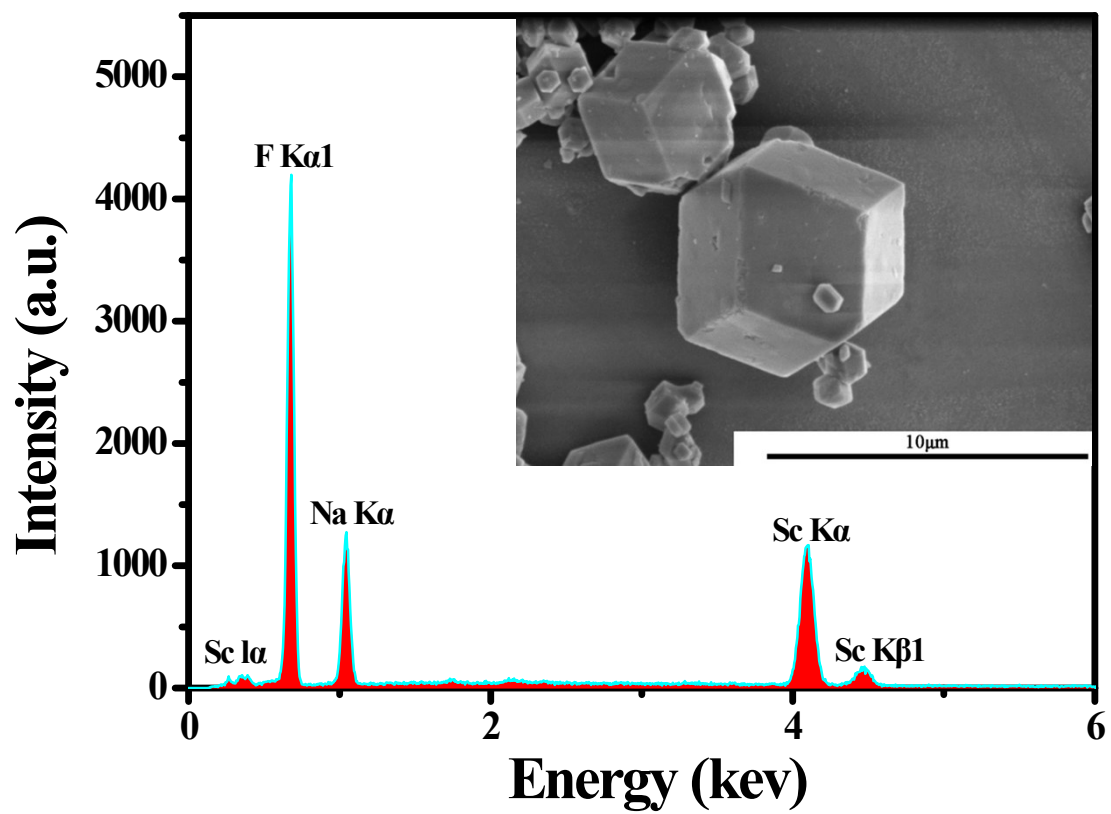

Fig. S2 EDS spectrum and SEM image of  $\text{Na}_3\text{Li}_3\text{Sc}_2\text{F}_{12}:\text{Mn}^{4+}$

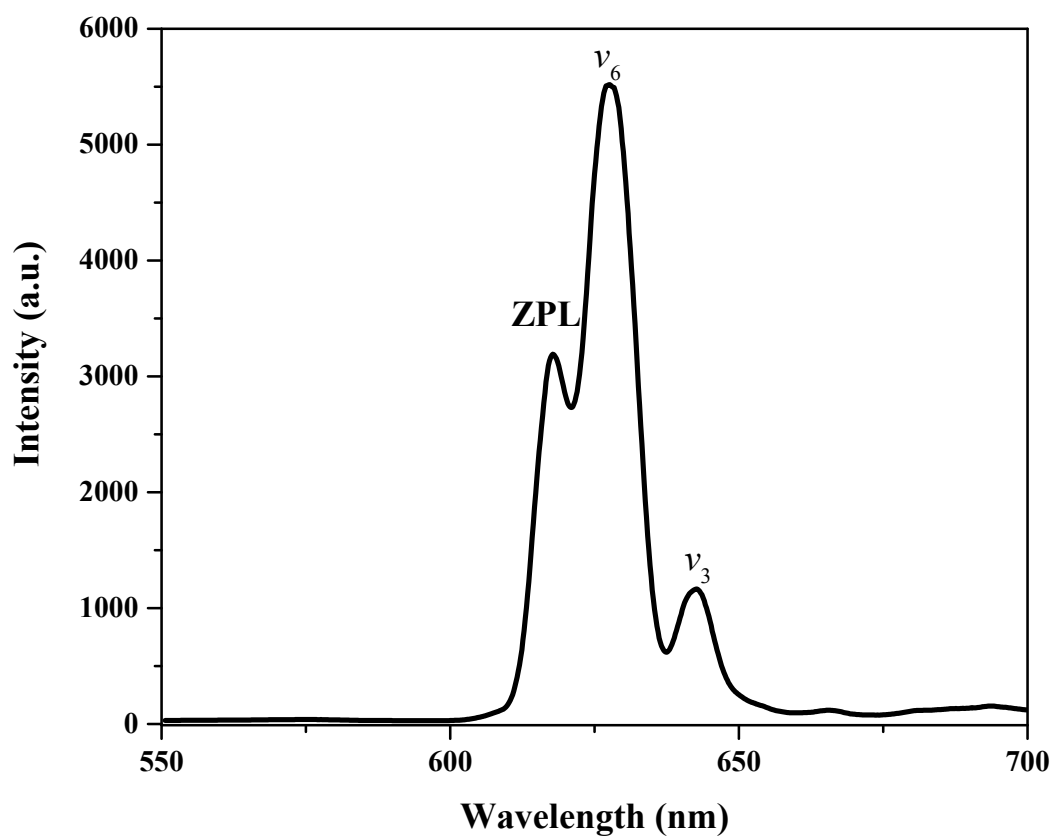

**Fig. S3** Emission spectrum of  $\text{Na}_3\text{Li}_3\text{Sc}_2\text{F}_{12}:\text{Mn}^{4+}$  at 77 K ( $\lambda_{\text{ex}} = 461$  nm)

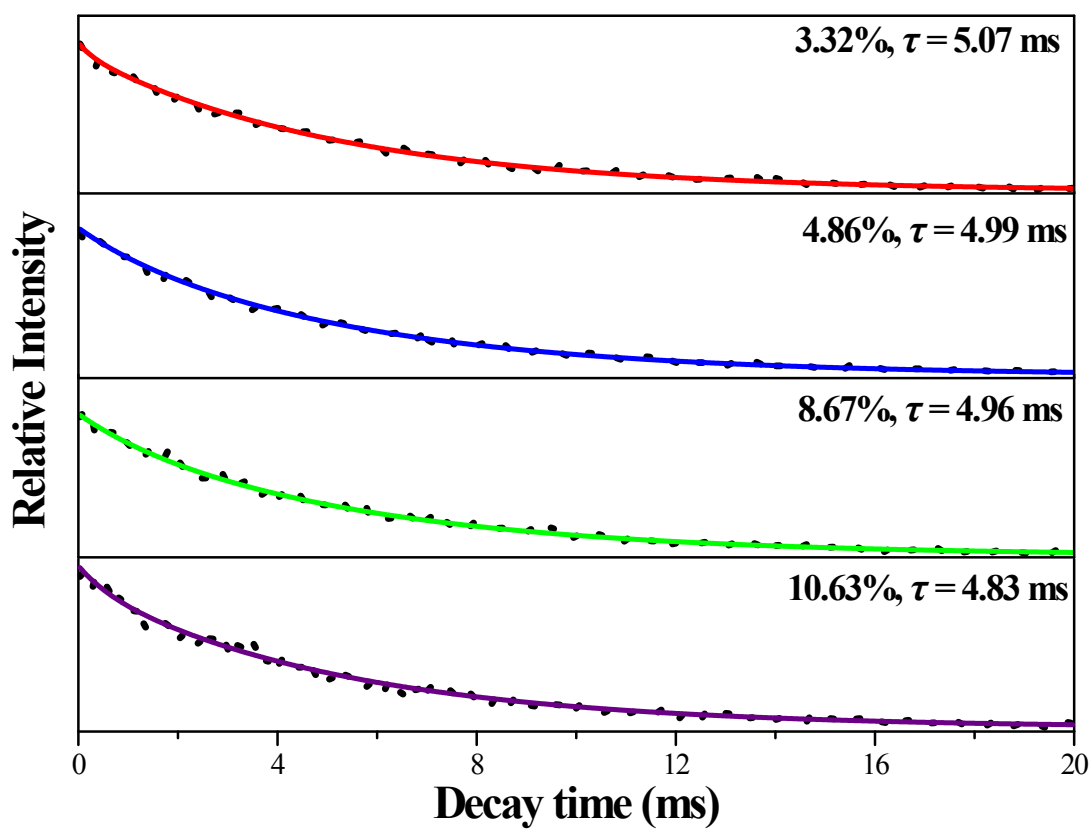

Fig. S4 Decay curves of  $\text{Na}_3\text{Li}_3\text{Sc}_2\text{F}_{12}:\text{Mn}^{4+}$  with different contents of  $\text{Mn}^{4+}$  ( $\lambda_{\text{em}} = 627 \text{ nm}$ ,  $\lambda_{\text{ex}} = 461 \text{ nm}$ )

**Table S1** Contents of Mn<sup>4+</sup> in Li<sub>3</sub>Na<sub>3</sub>Sc<sub>2</sub>F<sub>12</sub>:Mn<sup>4+</sup>

| Samples | Molar ratios of K <sub>2</sub> MnF <sub>6</sub> / Sc <sub>2</sub> O <sub>3</sub> | Doping amounts of Mn <sup>4+</sup> |
|---------|----------------------------------------------------------------------------------|------------------------------------|
| i       | 1:40                                                                             | 3.32%                              |
| ii      | 1:20                                                                             | 4.86%                              |
| iii     | 1:15                                                                             | 8.67%                              |
| v       | 1:10                                                                             | 10.63%                             |

**Table S2** Atomic parameters for  $\text{Li}_3\text{Na}_3\text{Sc}_2\text{F}_{12}:\text{Mn}^{4+}$ 

| Atom | X        | Y       | Z       | Occ.  | U     | Site |
|------|----------|---------|---------|-------|-------|------|
| Na   | 0.25000  | 0.12500 | 0.00000 | 1.004 | 0.035 | 24c  |
| Li   | 0.25000  | 0.37500 | 0.00000 | 1.038 | 0.037 | 24d  |
| Sc   | 0.00000  | 0.00000 | 0.00000 | 0.900 | 0.032 | 16a  |
| F    | -0.03011 | 0.04912 | 0.14861 | 1.054 | 0.035 | 96h  |
| Mn   | 0.00000  | 0.00000 | 0.00000 | 0.100 | 0.001 | 16a  |

**Table S3** Crystal data and structure refinement for  $\text{Li}_3\text{Na}_3\text{Sc}_2\text{F}_{12}:\text{Mn}^{4+}$ 

| Formula                             | $\text{Li}_3\text{Na}_3\text{Sc}_2\text{F}_{12}:\text{Mn}^{4+}$ |
|-------------------------------------|-----------------------------------------------------------------|
| Crystal system                      | Cubic                                                           |
| Space group                         | <i>Ia-3d</i> (230)                                              |
| <i>a</i> (Å)                        | 12.59956                                                        |
| <i>b</i> (Å)                        | 12.59956                                                        |
| <i>c</i> (Å)                        | 12.59956                                                        |
| <i>α</i>                            | 90.0000                                                         |
| <i>β</i>                            | 90.0000                                                         |
| <i>γ</i>                            | 90.0000                                                         |
| $V_{\text{cell}}$ (Å <sup>3</sup> ) | 2000.166341                                                     |
| <i>Z</i>                            | 8                                                               |
| $R_{\text{wp}}$                     | 9.77%                                                           |
| $R_{\text{p}}$                      | 6.40%                                                           |
| $\chi^2$                            | 2.001                                                           |
